# Supplementary material
Source: Springer Nature journal article supplement (https://www.springermedizin.de/resource/supplementary/12879_2011_4192_MOESM19_ESM.pdf/9444724)

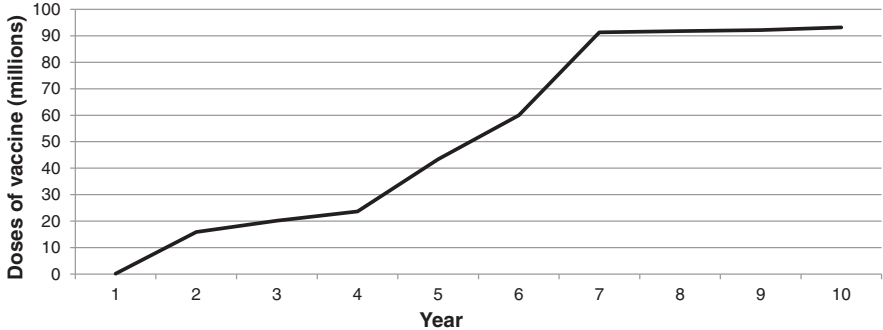

**Adopting  
countries**

1

7

3

1

5

6

12

1

0

0

Supplement: MOESM19 [file 9444724]
